# Supplementary material for: Human walking isn't all hard work: evidence of soft tissue contributions to energy dissipation and return
Source: Oxford University Press journal article supplement (doi:10.1242/jeb.044297), 2010-11-26
Supplement: jeb044297tables1.pdf [file jeb044297tables1.pdf]

Table S1. Nonlinear regression parameters for center-of-mass (COM) work

| COM work          | Coefficient ( $C$ )                | Offset ( $D$ )                    | $R^2$ |
|-------------------|------------------------------------|-----------------------------------|-------|
| Collision         | $-0.178 \pm 0.014$                 | $-0.002 \pm 0.002$                | 0.89  |
| Rebound           | $0.058 \pm 0.011$                  | $0.004 \pm 0.002$                 | 0.57  |
| Pre-load          | $0.017 \pm 0.008$                  | $-0.017 \pm 0.001$                | 0.20  |
| Push-off          | $0.095 \pm 0.012$                  | $0.017 \pm 0.002$                 | 0.77  |
| Swing             | $-1.3\text{E}-4 \pm 1.3\text{E}-4$ | $4.2\text{E}-5 \pm 2.1\text{E}-5$ | 0.05  |
| Net work (stride) | $-0.008 \pm 0.003$                 | $0.003 \pm 4\text{E}-4$           | 0.30  |

Data are reported as means  $\pm$  95% confidence intervals across subjects ( $N=10$ ).

Coefficients are reported in dimensionless form.
