# Supplementary material for: Human walking isn't all hard work: evidence of soft tissue contributions to energy dissipation and return
Source: Oxford University Press journal article supplement (doi:10.1242/jeb.044297), 2010-11-26
Supplement: jeb044297tables2.pdf [file jeb044297tables2.pdf]

Table S2. Nonlinear regression parameters for ankle–knee–hip joint work

| Ankle–knee–hip work | Coefficient ( $C$ ) | Offset ( $D$ )     | $R^2$ |
|---------------------|---------------------|--------------------|-------|
| Collision           | $-0.043 \pm 0.016$  | $0.002 \pm 0.002$  | 0.27  |
| Rebound             | $0.056 \pm 0.016$   | $-7E-4 \pm 0.003$  | 0.39  |
| Pre-load            | $0.012 \pm 0.013$   | $-0.017 \pm 0.002$ | 0.04  |
| Push-off            | $0.095 \pm 0.014$   | $0.019 \pm 0.002$  | 0.71  |
| Swing               | $-0.022 \pm 0.004$  | $-0.006 \pm 6E-4$  | 0.61  |
| Net work (stride)   | $0.098 \pm 0.036$   | $-0.002 \pm 0.006$ | 0.28  |

Data are reported as means  $\pm$  95% confidence intervals across subjects.

Coefficients are reported in dimensionless form.
